# Supplementary material
Source: MDPI journal article supplement (https://www.mdpi.com/2673-9992/14/1/49)
Supplement: s1 [file s1]

Aneta Pogorzelska<sup>1</sup>, Jarosław Sławiński<sup>1</sup>, Anna Kawiak<sup>2</sup>

<sup>1</sup>Medical University of Gdansk, Faculty of Pharmacy, Department of Organic Chemistry

<sup>2</sup> Intercollegiate Faculty of Biotechnology UG-MUG, Department of Biotechnology

#### INTRODUCTION:

Benzenesulfonylguanidine derivatives have been shown as potent cytotoxic agents against different types of human cancer cells [1-3]. This important pharmacophore is widely studied in our research team as a basic scaffold for searching new anticancer agents. Here, we described the series of derivatives modified by (2-chloroacetyl)amino and 2-imino-4-oxothiazolidine-3-yl groups.

#### SYNTHESIS:

The designed derivatives were obtained by a two-step synthesis as was shown at the scheme below. The starting substrates were the appropriate 1-(2-alkylthio-4-chloro-5-methyl)benzenesulfonyl)-3-aminoguanidines **1-4** which were transformed into 1-(2-alkylthio-4-chloro-5-methylbenzenesulfonyl)-3-[(2-chloroacetyl)amino]guanidines **5-8** by a reaction with chloroacetyl chloride. In the next step, the derivatives **5-8** were reacted with potassium thiocyanate yielding 1-(2-alkylthio-4-chloro-5-methylbenzenesulfonyl)-3-(2-imino-4-oxothiazolidine-3-yl)guanidines **9-12**. The compounds **5-8** were obtained with good yields above 79%, while derivatives **9-12** with slightly worse yields about 14-49% after purification. The structures of the synthesized compounds **5-12** were confirmed by IR, <sup>1</sup>H NMR, and elemental analyses.

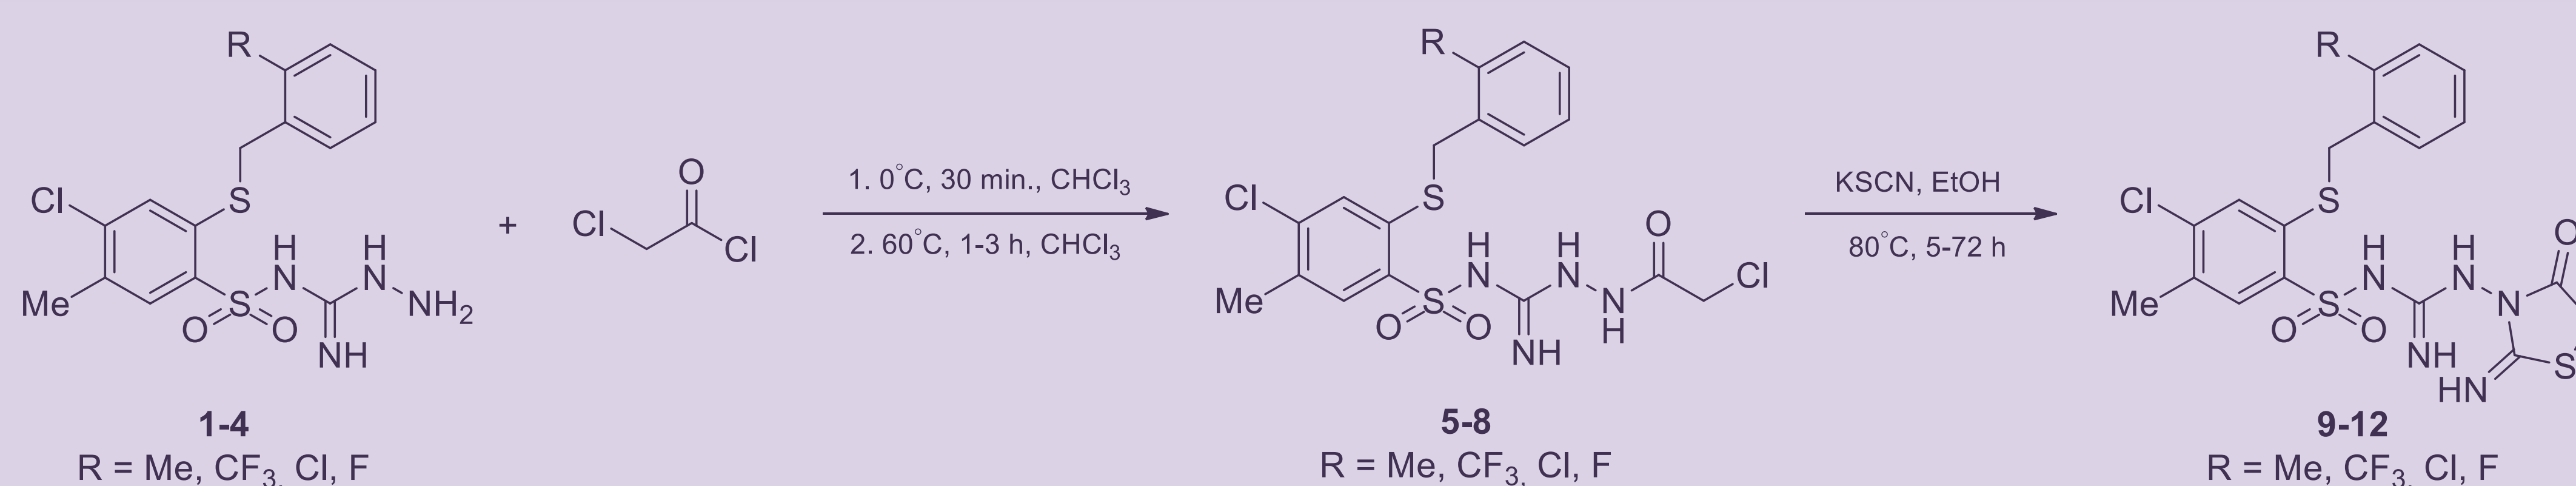

#### CYTOTOXIC ACTIVITY:

The synthesized derivatives **5-12** were evaluated *in vitro* by MTT assay for their activity against three human cancer cell lines: colon cancer HCT-116, breast cancer MCF-7, and cervical cancer HeLa. The activity against non-cancerous human epidermal keratinocyte line HaCaT was also examined. The data indicate that compounds **5-8** inhibit the growth of cancer cells stronger than derivatives **9-12**. The selective cytotoxic effect against HCT-116 cells was found for benzenesulfonylguanidine **6** containing 2-(trifluoromethyl)benzylthio group at position 2 of benzenesulfonyl scaffold. The IC<sub>50</sub> value was 13 μM, while IC<sub>50</sub> for HaCaT cells was 48 μM. Good selectivity was also observed for compound **7**, with 2-chloromethylbenzylthio substituent, against HCT-116 and MCF-7 cells (IC<sub>50</sub> = 12 and 19 μM, respectively for HCT-116 and MCF-7 cells, IC<sub>50</sub> = 47 μM for HaCaT cells). Among compounds **9-12**, only compound **9** showed moderate but selective cytotoxicity against MCF-7 cells, with IC<sub>50</sub> = 18 μM compared with IC<sub>50</sub> = 54 μM for HaCaT cells.

| Compd | R               | IC <sub>50</sub> [μM] |                 |                 |            |
|-------|-----------------|-----------------------|-----------------|-----------------|------------|
|       |                 | HeLa                  | HCT-116         | MCF-7           | HaCaT      |
| 5     | Me              | 32 ± 1                | 26 ± 1          | 25 ± 1          | 49 ± 3     |
| 6     | CF <sub>3</sub> | 30 ± 1                | <b>13 ± 0.4</b> | 25 ± 1          | 48 ± 3     |
| 7     | Cl              | 34 ± 2                | <b>12 ± 0.4</b> | <b>19 ± 0.7</b> | 47 ± 3     |
| 8     | F               | 73 ± 3                | 60 ± 3          | 43 ± 2          | 92 ± 5     |
| 9     | Me              | 37 ± 2                | 35 ± 1          | <b>18 ± 0.7</b> | 54 ± 3     |
| 10    | CF <sub>3</sub> | 54 ± 3                | 64 ± 4          | 45 ± 2          | 101 ± 6    |
| 11    | Cl              | 82 ± 4                | 99 ± 6          | 51 ± 3          | 145 ± 8    |
| 12    | F               | 97 ± 6                | 118 ± 6         | 66 ± 42         | Not tested |

#### REFERENCES:

[1] Żołnowska B., Sławiński J., Pogorzelska A. et al. *Eur J Med. Chem.* **2014**; *71*; 135–147. [2] Pogorzelska A., Sławiński J., Kawiak A. et al. *Eur. J. Med. Chem.* **2018**; *155*; 670–680. [3] Sławiński J., Bednarski P., Reszka P. *Polish J Chem.* **2004**; *78*; 369–379.
